# Supplementary material for: Revisiting Ag–π interactions with bis((pyrrol-2-yl)methylene)hydrazine: CC versus CN bond complexation
Source: Royal Society of Chemistry journal article supplement (doi:10.1039/c9ce00168a), 2019-01-01
Supplement: c9ce00168a1.pdf [file c9ce00168a1.pdf]

## Electronic Supplementary Information

### Revisiting Ag- $\pi$ interactions with bis((pyrrol-2-yl)methylene)hydrazine: CC versus CN bond complexation

Stéphane A. Baudron,<sup>a</sup> Hubert Chevreau<sup>b</sup>

<sup>a</sup> Laboratoire de Tectonique Moléculaire, UMR Uds-CNRS 7140, icFRC

Institut Le Bel, Université de Strasbourg

4 rue Blaise Pascal, CS 90032, F-67081 Strasbourg cedex, France

Fax: (+) 33 3 68 85 13 25

E-mail: [sbaudron@unistra.fr](mailto:sbaudron@unistra.fr)

<sup>b</sup> Synchrotron SOLEIL

L'Orme des merisiers, BP 48,

F-91192 Saint-Aubin, France

Tel : 33 169359700

E-mail : [hubert.chevreau@synchrotron-soleil.fr](mailto:hubert.chevreau@synchrotron-soleil.fr)

#### Synthesis

Compound **1** has been synthesized as described.<sup>1</sup> Elemental analyses were performed by the *Service commun d'analyse* (University of Strasbourg).

Network **3**: In a vial (hx $\varnothing$  = 65x22 mm), a CH<sub>2</sub>Cl<sub>2</sub> (5 mL) solution of **1** (10 mg, 0.053 mmol) was first layered with a CH<sub>2</sub>Cl<sub>2</sub>/AcOEt 1/1 mixture (2 mL) and then with a concentrated AcOEt solution (2 mL) of AgOTf. Upon diffusing over a week, yellow crystals of **3** formed and were recovered by filtration (24.9 mg, 63 %). Anal. Calcd. for C<sub>12</sub>H<sub>14</sub>Ag<sub>2</sub>F<sub>6</sub>N<sub>4</sub>O<sub>8</sub>S<sub>2</sub>: C, 19.58%; H, 1.92%; N, 7.61%; Found: C, 19.61%; H, 1.95%; N, 7.57%.

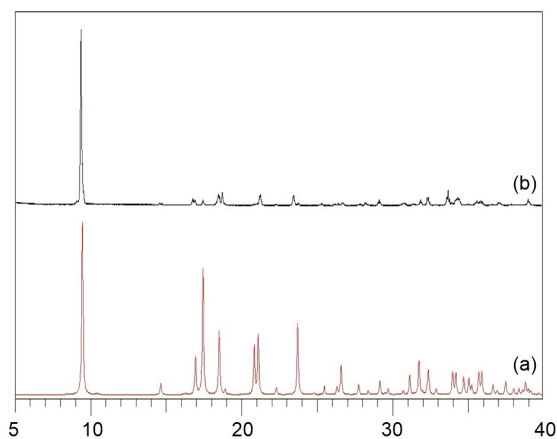

**Fig. ESI1** Simulated (a) and experimental (b) PRXD pattern for network **3**.

**Network 4:** In a vial (hx $\varnothing$  = 65x22 mm), a CHCl<sub>3</sub> (5 mL) solution of **1** (10 mg, 0.053 mmol) was first layered with a CHCl<sub>3</sub>/MeOH 1/1 mixture (2 mL) and then with a concentrated MeOH solution (2 mL) of AgOTs. Upon diffusing over a week, the clear yellow solution was filtered. Upon Et<sub>2</sub>O vapor diffusion over the mixture, yellow crystals of **4** formed. They were recovered by filtration (8 mg, 20 %).

Alternative synthesis: 10 mg of **1** and 30 mg of AgTsO were loaded into a 10 mL agate container equipped with an agate ball. Milling using a Retsch MM 400 for 30 min at 300 Hz afforded quantitatively **4** as a yellow powder in pure form. Anal. Calcd. for C<sub>24</sub>H<sub>24</sub>Ag<sub>2</sub>N<sub>4</sub>O<sub>6</sub>S<sub>2</sub>: C, 38.73%; H, 3.25%; N, 7.53%; Found: C, 37.96%; H, 3.24%; N, 6.92%.

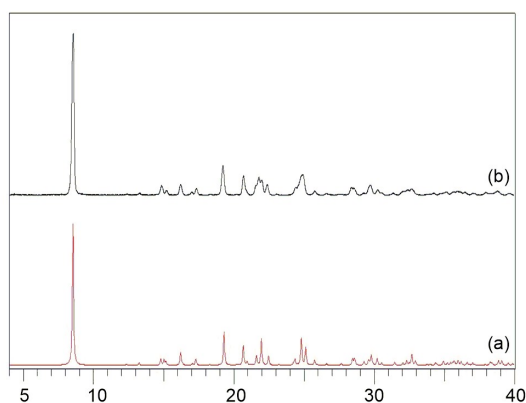

**Fig. ESI2** Simulated (a) and experimental (b) PRXD pattern for network **4**.

**Network 5:** In a vial (hx $\varnothing$  = 65x22 mm), a CHCl<sub>3</sub> (5 mL) solution of **1** (10 mg, 0.053 mmol) was first layered with a CHCl<sub>3</sub>/MeOH 1/1 mixture (2 mL) and then with a concentrated MeOH solution (2 mL) of AgBF<sub>4</sub>. Upon diffusing over four weeks, few yellow crystals of **5** incorporating the SiF<sub>6</sub><sup>2-</sup> anion and a yellow precipitate formed.

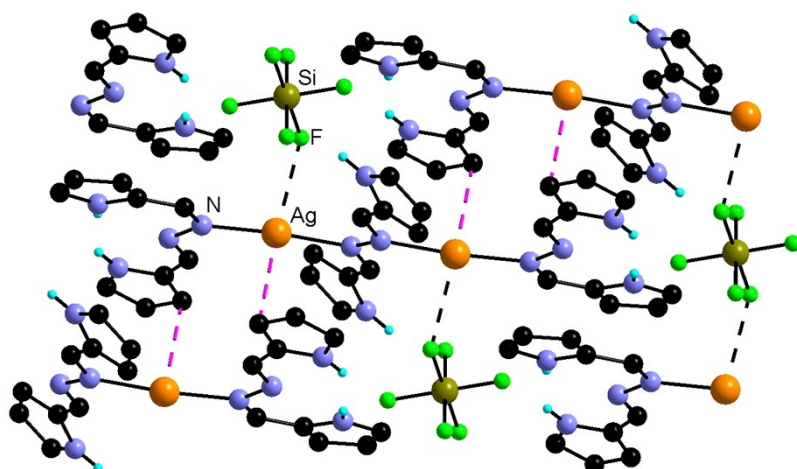

**Fig. ESI1** Crystal structure of network **5**. Ag- $\pi$  interactions are highlighted in purple dash lines. CH<sub>2</sub>Cl<sub>2</sub> molecules have been omitted for clarity.

Networks **2'** and **6**: In a vial (hx $\varnothing$  = 65x22 mm), a CHCl<sub>3</sub> (5 mL) solution of **1** (10 mg, 0.053 mmol) was first layered with a CHCl<sub>3</sub>/MeOH 1/1 mixture (2 mL) and then with a concentrated MeOH solution (2 mL) of AgNO<sub>3</sub> (18.2 mg, 0.107 mmol). Upon diffusing over a week, yellow crystals of **2'** and **6** formed and were recovered by filtration (22 mg). Both compounds could not be separated from each other. Furthermore, crystals of **6** were shown to desolvate upon exposure to air, preventing further analysis.

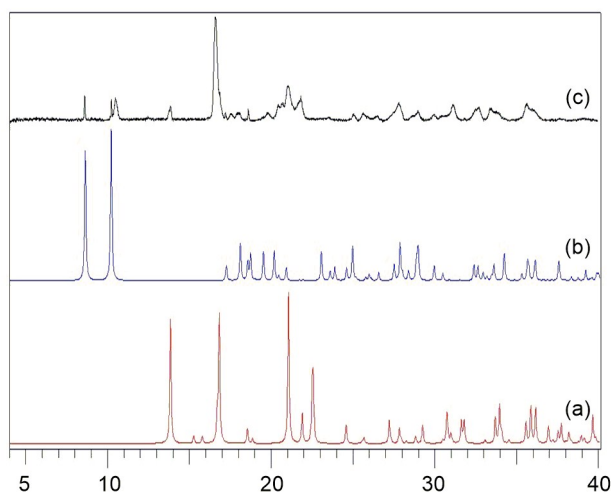

**Fig. ESI4** Simulated PRXD pattern for network **2'** (a) and **6** (b) and experimental pattern showing the mixture of the two phases obtained (c).

## X-Ray diffraction

Single-crystal data (Table ESI1) were collected on a Bruker SMART CCD diffractometer with Mo–K $\alpha$  radiation at 173 K. The structures were solved using SHELXS-97 and refined by full matrix least-squares on  $F^2$  using SHELXL-2014 with anisotropic thermal parameters for all non-hydrogen atoms.<sup>2</sup> The hydrogen atoms were introduced at calculated positions and not refined (riding model).

In the structure of **6**, one nitrate anion is disordered over two positions that have been modeled accordingly.

CCDC 1893848-1893853 contain the supplementary crystallographic data for compounds **1**(H<sub>2</sub>O), **2'**-**6**. These data can be obtained free of charge via [www.ccdc.cam.ac.uk/data\\_request/cif](http://www.ccdc.cam.ac.uk/data_request/cif).

Table ESI1 Crystallographic data for compounds **1**(H<sub>2</sub>O), **2'** and **3**.

|                                          | <b>1</b> (H <sub>2</sub> O)                      | <b>2'</b>                                                                     | <b>3</b>                                                                                                    |
|------------------------------------------|--------------------------------------------------|-------------------------------------------------------------------------------|-------------------------------------------------------------------------------------------------------------|
| Formula                                  | C <sub>10</sub> H <sub>12</sub> N <sub>4</sub> O | C <sub>10</sub> H <sub>10</sub> Ag <sub>2</sub> N <sub>6</sub> O <sub>6</sub> | C <sub>12</sub> H <sub>14</sub> Ag <sub>2</sub> F <sub>6</sub> N <sub>4</sub> O <sub>8</sub> S <sub>2</sub> |
| FW                                       | 204.24                                           | 525.98                                                                        | 607.41                                                                                                      |
| Crystal system                           | Monoclinic                                       | Monoclinic                                                                    | Triclinic                                                                                                   |
| Space group                              | <i>P2/c</i>                                      | <i>P2<sub>1</sub>/n</i>                                                       | <i>P</i> -1                                                                                                 |
| <i>a</i> / Å                             | 11.9283(6)                                       | 9.8391(4)                                                                     | 6.1112(3)                                                                                                   |
| <i>b</i> / Å                             | 6.5439(3)                                        | 6.9334(3)                                                                     | 9.5660(5)                                                                                                   |
| <i>c</i> / Å                             | 6.8123(3)                                        | 10.9235(5)                                                                    | 10.6221(6)                                                                                                  |
| $\alpha$ / °                             |                                                  |                                                                               | 63.173(2)                                                                                                   |
| $\beta$ / °                              | 105.114(2)                                       | 103.517(2)                                                                    | 82.885(2)                                                                                                   |
| $\gamma$ / °                             |                                                  |                                                                               | 89.971(2)                                                                                                   |
| <i>V</i> / Å <sup>3</sup>                | 513.36(4)                                        | 724.54(5)                                                                     | 548.79(5)                                                                                                   |
| <i>Z</i>                                 | 2                                                | 2                                                                             | 1                                                                                                           |
| <i>T</i> / K                             | 173(2)                                           | 173(2)                                                                        | 173(2)                                                                                                      |
| $\mu$ / mm <sup>-1</sup>                 | 0.091                                            | 2.748                                                                         | 2.073                                                                                                       |
| Refls. coll.                             | 32009                                            | 50156                                                                         | 50377                                                                                                       |
| Ind. refls. (Rint)                       | 1501 (0.0415)                                    | 2152 (0.0401)                                                                 | 2985 (0.0649)                                                                                               |
| $R_1$ ( $I > 2\sigma(I)$ ) <sup>a</sup>  | 0.0437                                           | 0.0194                                                                        | 0.0204                                                                                                      |
| $wR_2$ ( $I > 2\sigma(I)$ ) <sup>a</sup> | 0.1189                                           | 0.0446                                                                        | 0.0477                                                                                                      |
| $R_1$ (all data) <sup>a</sup>            | 0.0483                                           | 0.0205                                                                        | 0.0211                                                                                                      |
| $wR_2$ (all data) <sup>a</sup>           | 0.1223                                           | 0.0454                                                                        | 0.0480                                                                                                      |
| GOF                                      | 1.079                                            | 1.049                                                                         | 1.052                                                                                                       |

<sup>a</sup>  $R_1 = \sum ||F_o| - |F_c|| / \sum |F_o|$ ;  $wR_2 = [\sum w(F_o^2 - F_c^2)^2 / \sum wF_o^4]^{1/2}$

Table ESI2 Crystallographic data for compounds 4-6.

|                                                                          | <b>4</b>                                                                                     | <b>5</b>                                                                                          | <b>6</b>                                                                      |
|--------------------------------------------------------------------------|----------------------------------------------------------------------------------------------|---------------------------------------------------------------------------------------------------|-------------------------------------------------------------------------------|
| Formula                                                                  | C <sub>24</sub> H <sub>24</sub> Ag <sub>2</sub> N <sub>4</sub> O <sub>6</sub> S <sub>2</sub> | C <sub>31</sub> H <sub>32</sub> Ag <sub>2</sub> Cl <sub>2</sub> F <sub>6</sub> N <sub>12</sub> Si | C <sub>11</sub> H <sub>14</sub> Ag <sub>2</sub> N <sub>6</sub> O <sub>7</sub> |
| FW                                                                       | 1334.19                                                                                      | 1001.41                                                                                           | 558.02                                                                        |
| Crystal system                                                           | Monoclinic                                                                                   | Monoclinic                                                                                        | Orthorhombic                                                                  |
| Space group                                                              | <i>P2<sub>1</sub>/c</i>                                                                      | <i>C2/c</i>                                                                                       | <i>Pnma</i>                                                                   |
| <i>a</i> / Å                                                             | 10.6098(4)                                                                                   | 13.5975(7)                                                                                        | 20.5483(12)                                                                   |
| <i>b</i> / Å                                                             | 7.3320(3)                                                                                    | 13.8536(7)                                                                                        | 16.1886(10)                                                                   |
| <i>c</i> / Å                                                             | 16.7744(7)                                                                                   | 19.2691(9)                                                                                        | 4.8655(2)                                                                     |
| $\beta$ / °                                                              | 101.451(2)                                                                                   | 92.402(3)                                                                                         |                                                                               |
| <i>V</i> / Å <sup>3</sup>                                                | 1278.92(9)                                                                                   | 3626.6(3)                                                                                         | 1618.50(15)                                                                   |
| <i>Z</i>                                                                 | 2                                                                                            | 4                                                                                                 | 4                                                                             |
| <i>T</i> / K                                                             | 173(2)                                                                                       | 173(2)                                                                                            | 173(2)                                                                        |
| $\mu$ / mm <sup>-1</sup>                                                 | 1.743                                                                                        | 1.335                                                                                             | 2.290                                                                         |
| Refls. coll.                                                             | 12611                                                                                        | 56710                                                                                             | 10291                                                                         |
| Ind. refls. (Rint)                                                       | 3744 (0.0440)                                                                                | 5034 (0.0534)                                                                                     | 2414 (0.0343)                                                                 |
| <i>R</i> <sub>1</sub> ( <i>I</i> >2 $\sigma$ ( <i>I</i> )) <sup>a</sup>  | 0.0474                                                                                       | 0.0468                                                                                            | 0.0250                                                                        |
| <i>wR</i> <sub>2</sub> ( <i>I</i> >2 $\sigma$ ( <i>I</i> )) <sup>a</sup> | 0.1134                                                                                       | 0.1132                                                                                            | 0.0584                                                                        |
| <i>R</i> <sub>1</sub> (all data) <sup>a</sup>                            | 0.0642                                                                                       | 0.0791                                                                                            | 0.0318                                                                        |
| <i>wR</i> <sub>2</sub> (all data) <sup>a</sup>                           | 0.1239                                                                                       | 0.1259                                                                                            | 0.0626                                                                        |
| GOF                                                                      | 1.050                                                                                        | 1.048                                                                                             | 1.027                                                                         |

$$^a R_1 = \sum ||F_o| - |F_c|| / \sum |F_o|; wR_2 = [\sum w(F_o^2 - F_c^2)^2 / \sum wF_o^4]^{1/2}$$

### Computational calculations

All calculations were carried out using planewave based density functional theory (DFT) with Quantum-ESPRESSO.<sup>3</sup> All geometry optimizations were carried out using the PBE functional. Core electrons were described using PAW pseudopotentials. The DFT-D2 method of Grimme was used to describe van der Waals interactions.<sup>4</sup> A planewave cut-off energy of 80 Ry was used to describe the wavefunctions in all calculations, The total energy and force convergence threshold was set up at 5.10<sup>-6</sup> Ry and 5.10<sup>-5</sup> Ry/Bohr<sup>3</sup>, respectively. The Brillouin zone was sampled using a 4×6×4, 4×6×4, 7×5×4, 5×6×3, 5×5×4 and 2×3×8 k-point Monkhorst-Pack grid for the in-slab dimensions, for compound **2**, **2'**, **3**, **4**, **5** and **6**, respectively.

### References

1. L. Yang, X. Shan, Q. Chen, Z. Wang and J. S. Ma, *Eur. J. Inorg. Chem.*, 2004, 1474.
2. G. M. Sheldrick, *Acta Cryst.*, 2008, **A64**, 112.
3. P. Giannozzi, O. Andreussi, T. Brumme, O. Bunau, M. Buongiorno Nardelli, M. Calandra, R. Car, C. Cavazzoni, D. Ceresoli, M. Cococcioni, N. Colonna, I. Carnimeo, A. Dal Corso, S. de Gironcoli, P. Delugas, R. A. DiStasio Jr, A. Ferretti, A. Floris, G. Fratesi, G. Fugallo, R. Gebauer, U. Gerstmann, F. Giustino, T. Gorni, J.

Jia, M. Kawamura, H.-Y. Ko, A. Kokalj, E. Küçükbenli, M. Lazzeri, M. Marsili, N. Marzari, F. Mauri, N. L. Nguyen, H.-V. Nguyen, A. Otero-de-la-Roza, L. Paulatto, S. Poncé, D. Rocca, R. Sabatini, B. Santra, M. Schlipf, A. P. Seitsonen, A. Smogunov, I. Timrov, T. Thonhauser, P. Umari, N. Vast, X. Wu and S. Baroni, *J. Phys. Condens. Matter*, 2017, **29**, 465901.

4. S. Grimme, *J. Comp. Chem.*, 2006, **27**, 1787.
